# Supplementary material
Source: PubMed Central journal article supplement (PMC2562909)

Fig. 1a

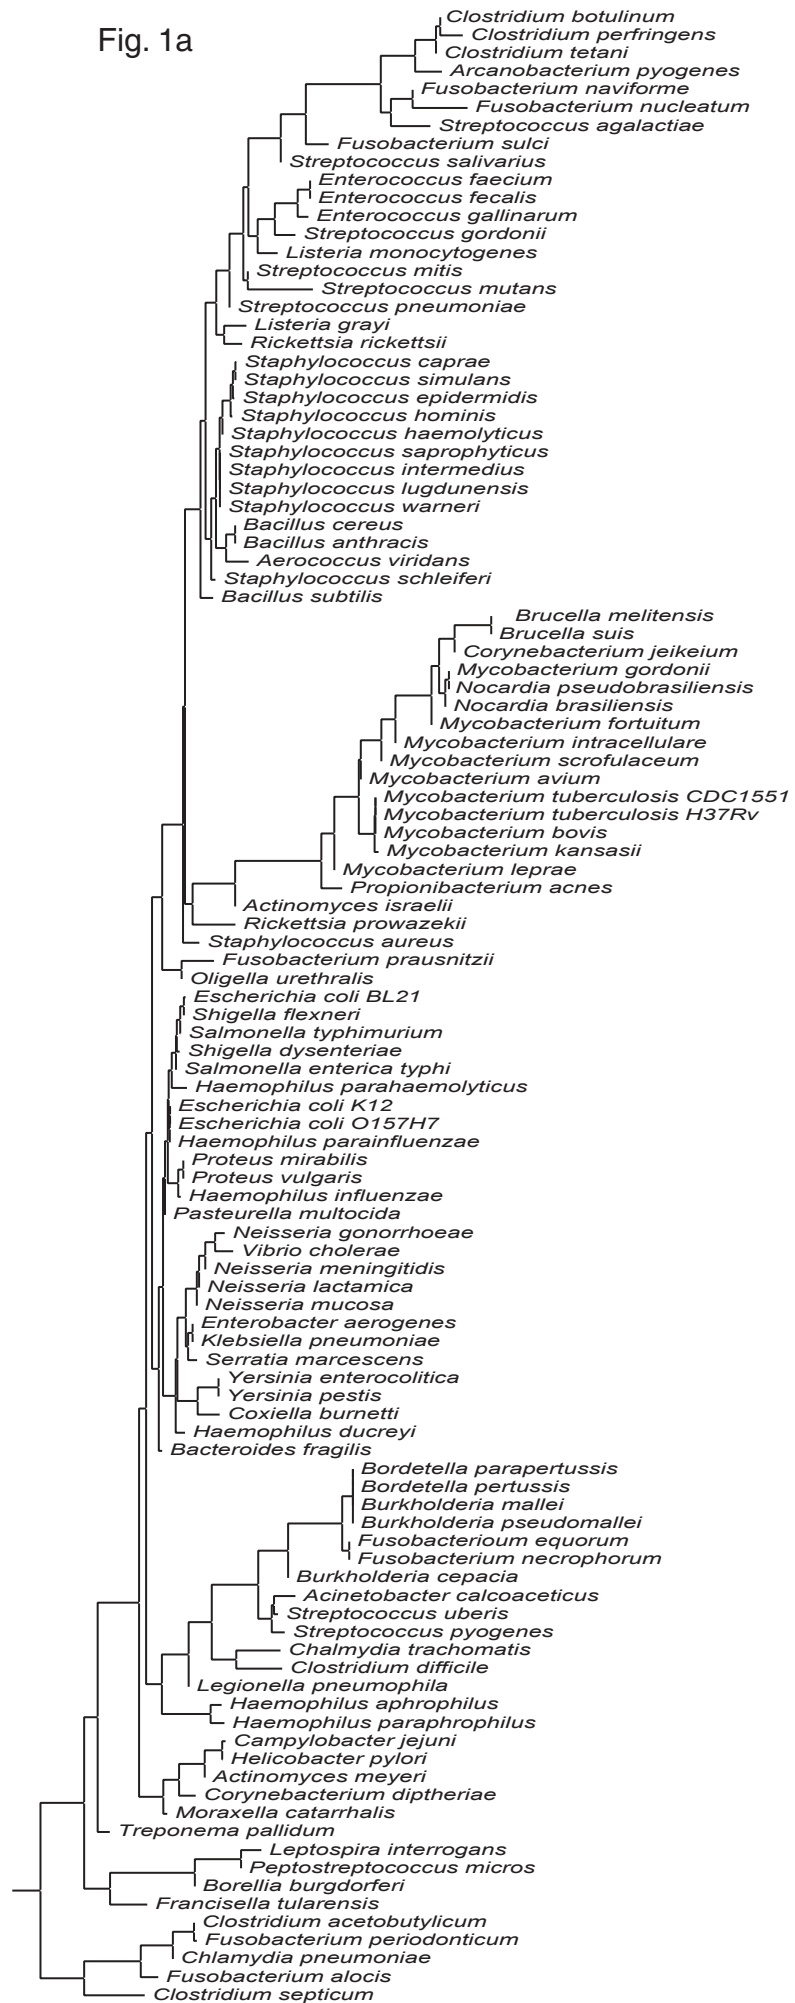

Supplement: NIHMS22082-supplement-01.pdf [file NIHMS22082-supplement-01.pdf]

Fig. 1b

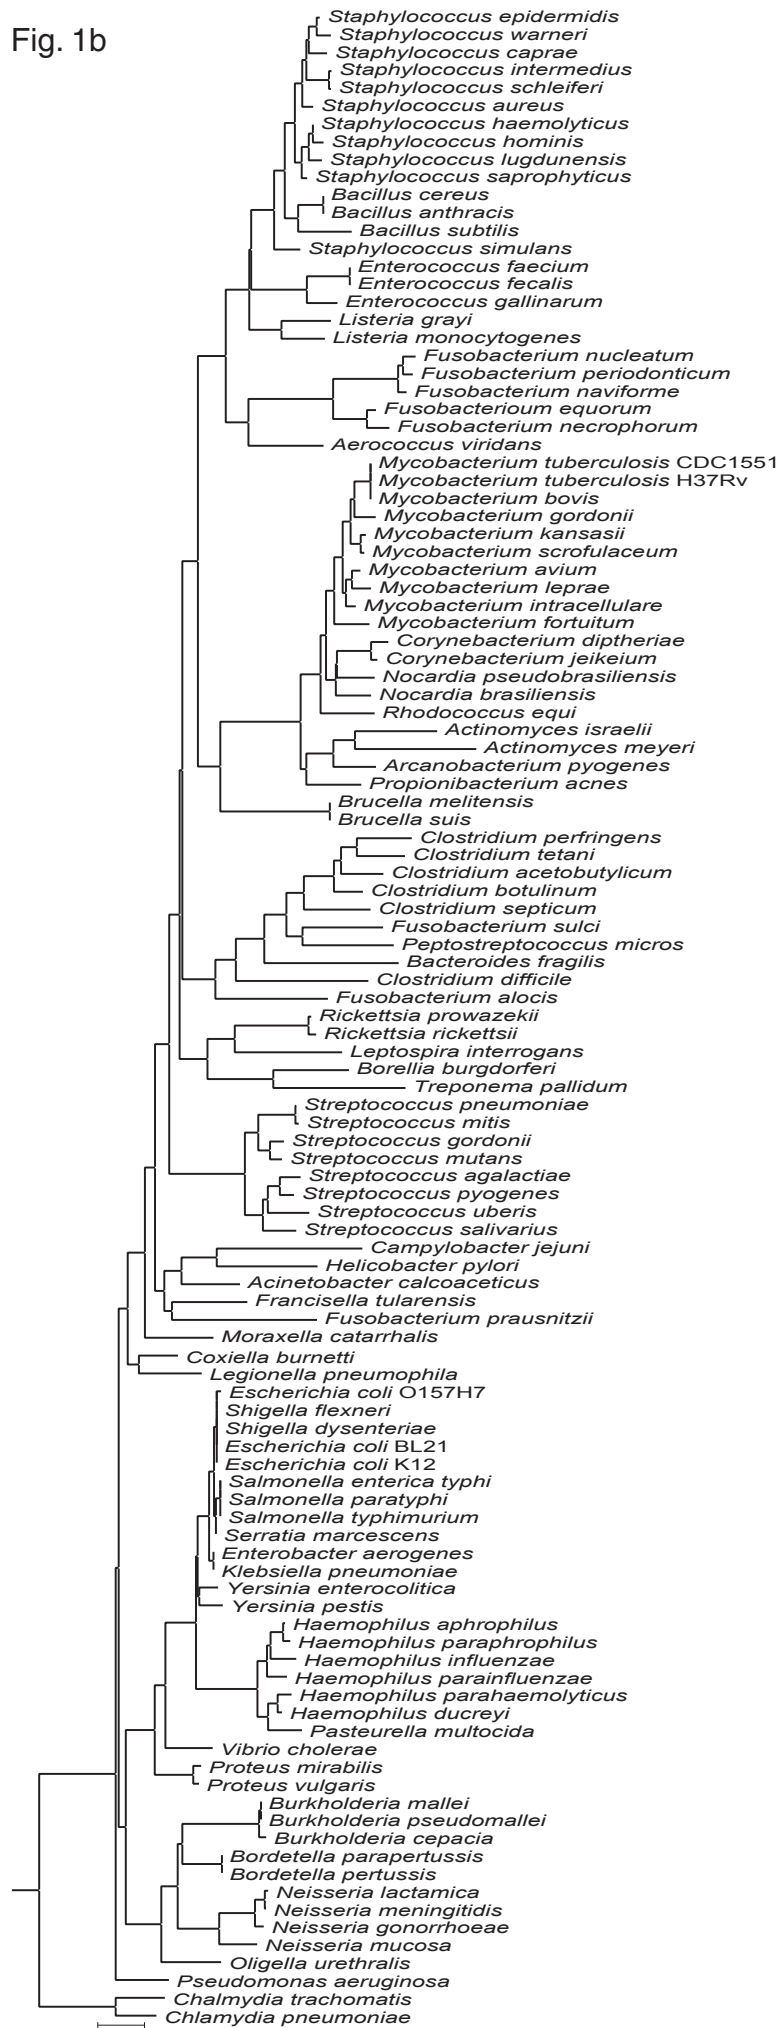

Supplement: NIHMS22082-supplement-02.pdf [file NIHMS22082-supplement-02.pdf]

Fig. 1d

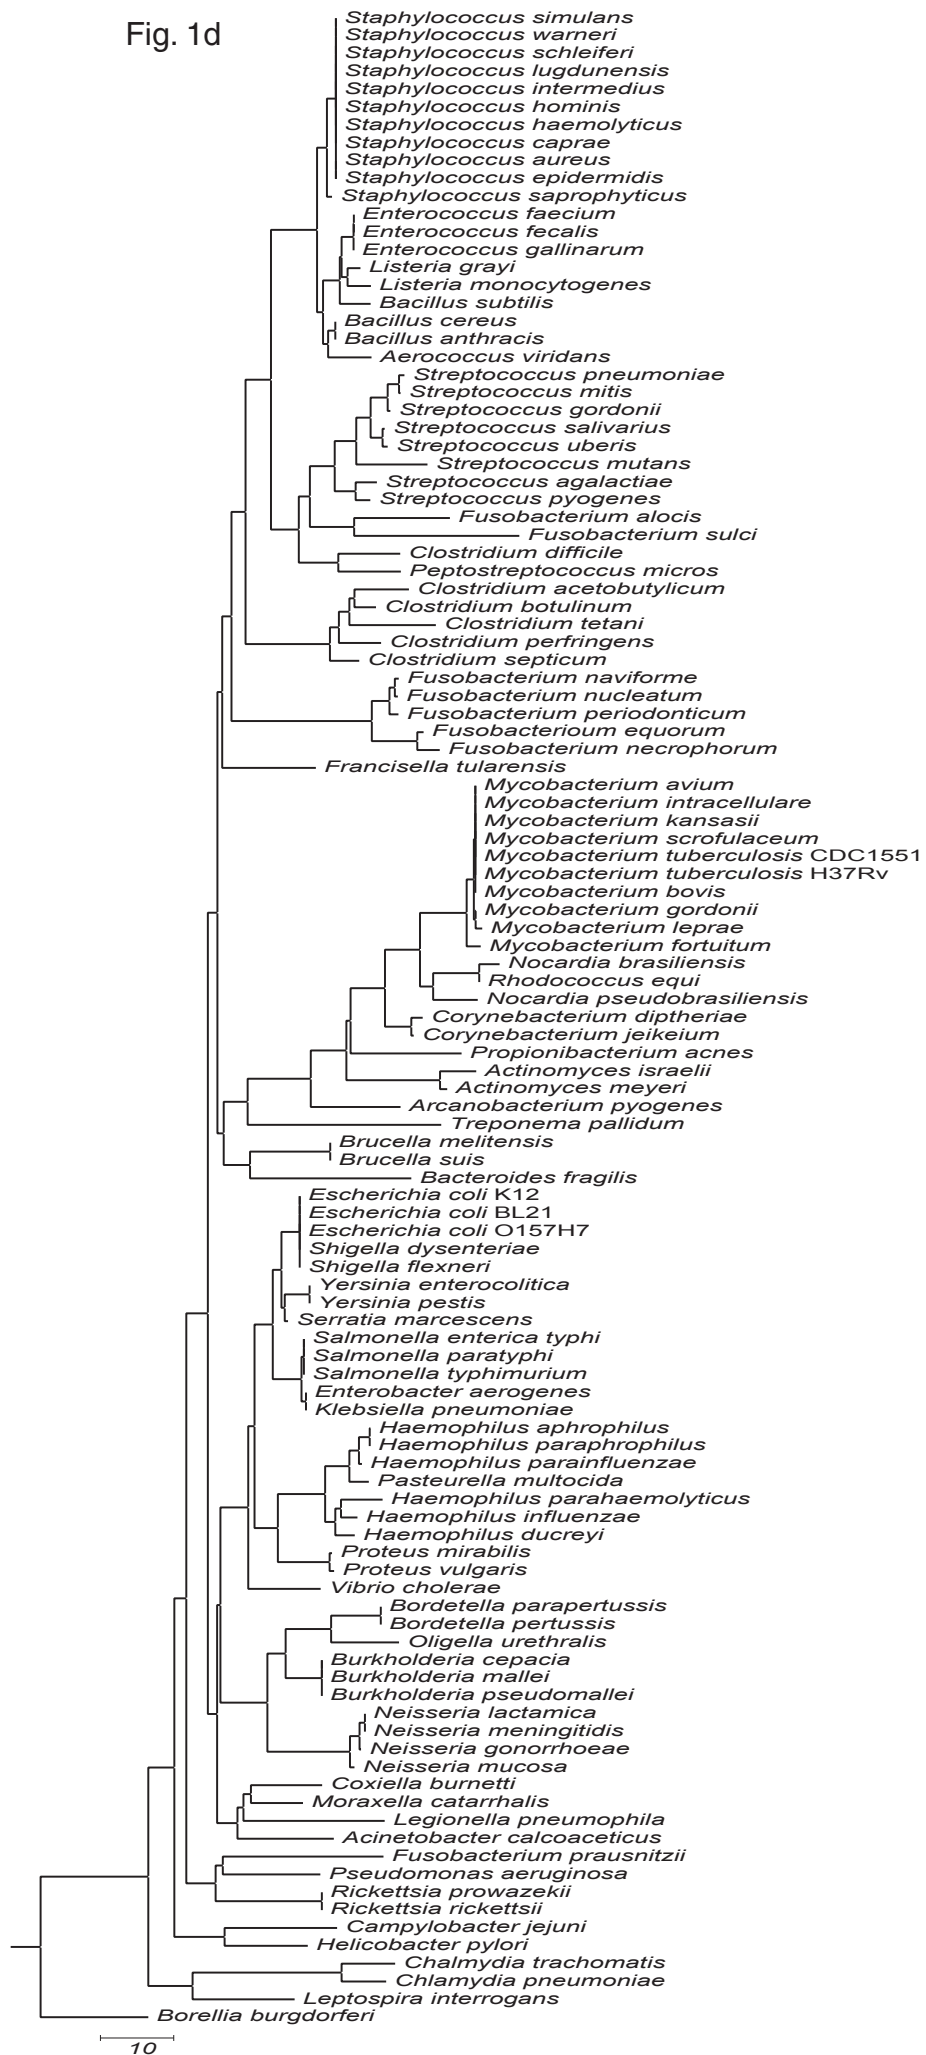

10

Supplement: NIHMS22082-supplement-03.pdf [file NIHMS22082-supplement-03.pdf]

Fig. 1e

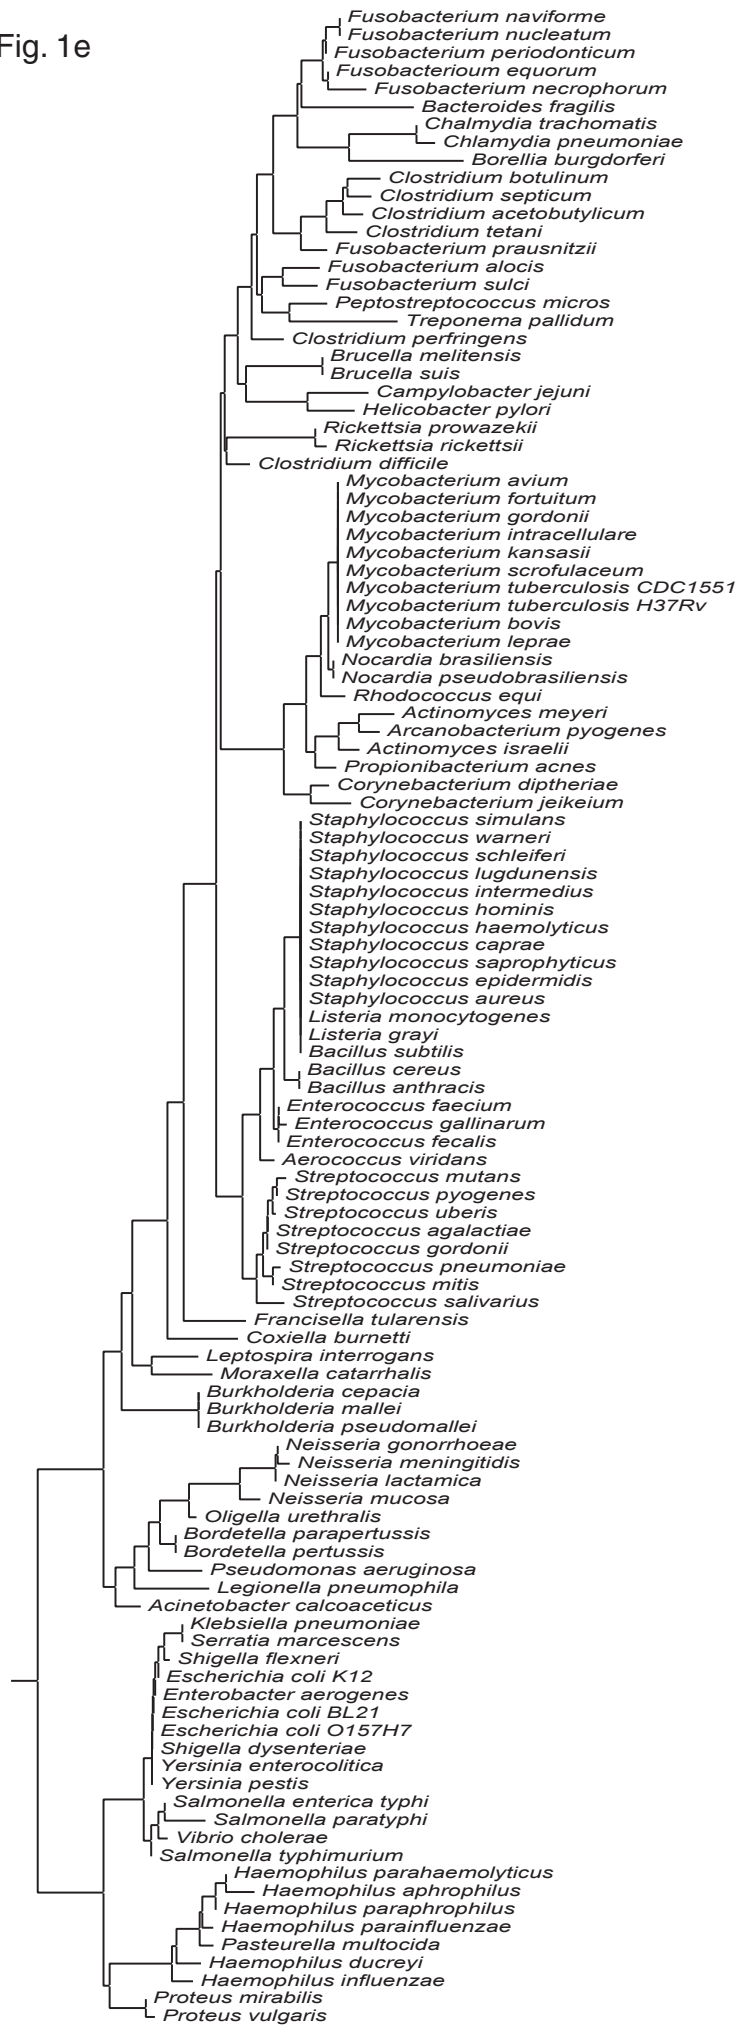

20

Supplement: NIHMS22082-supplement-04.pdf [file NIHMS22082-supplement-04.pdf]

Fig. 1g

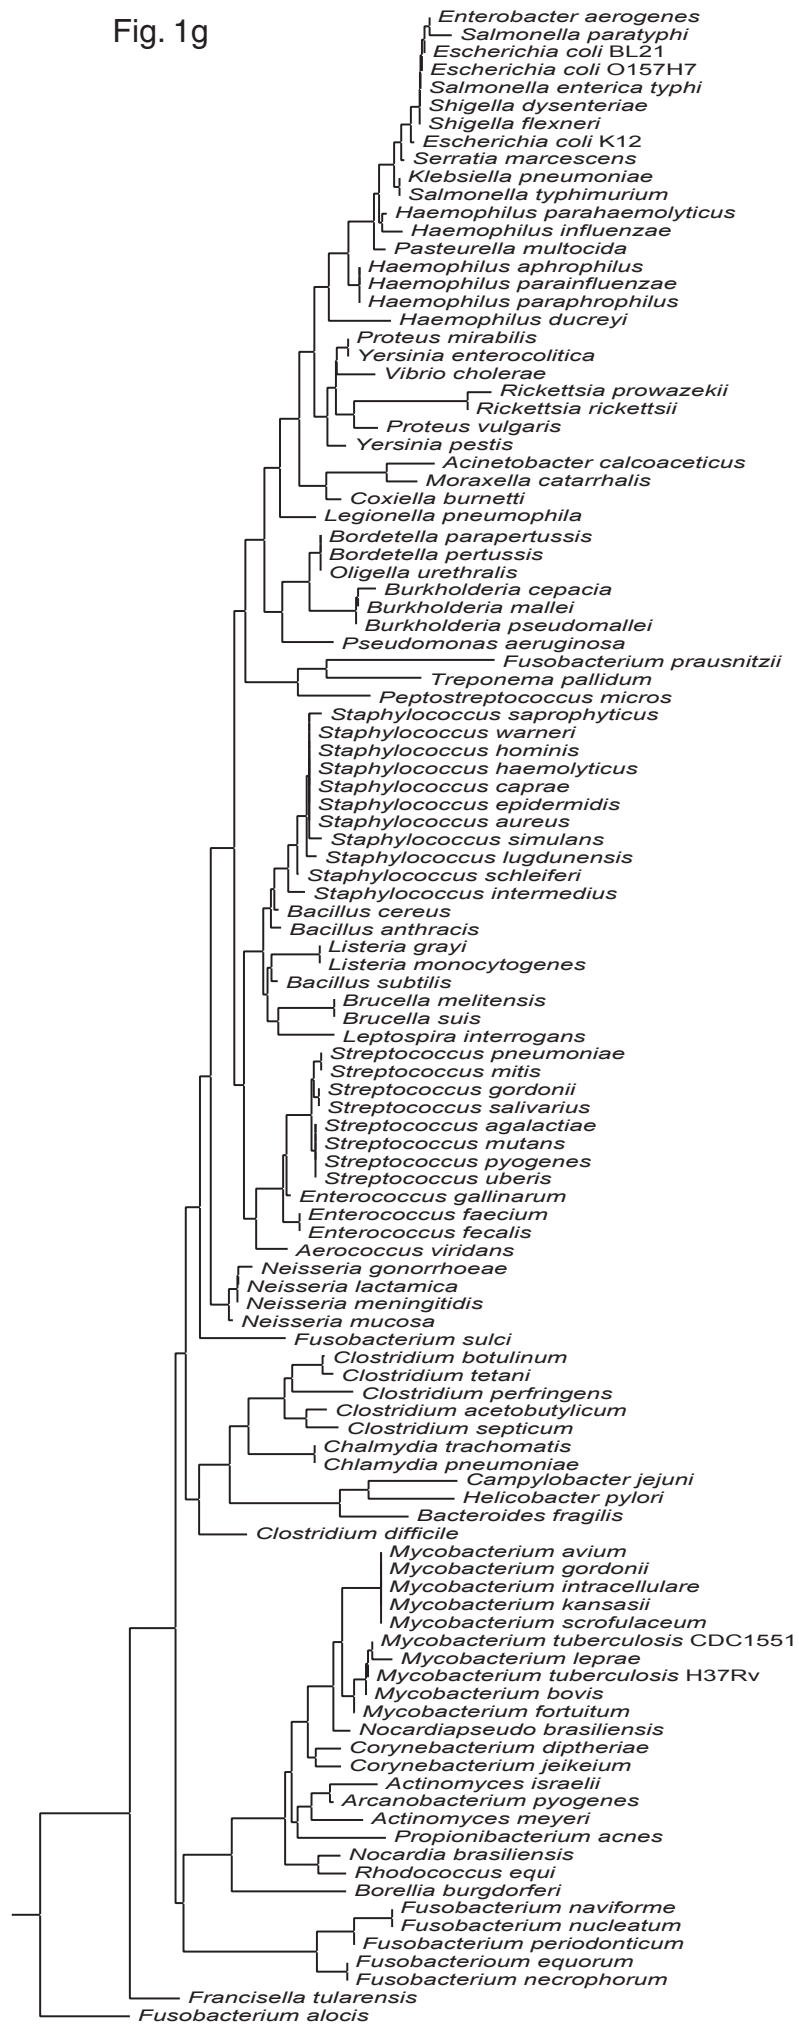

Supplement: NIHMS22082-supplement-05.pdf [file NIHMS22082-supplement-05.pdf]

Fig. 1h

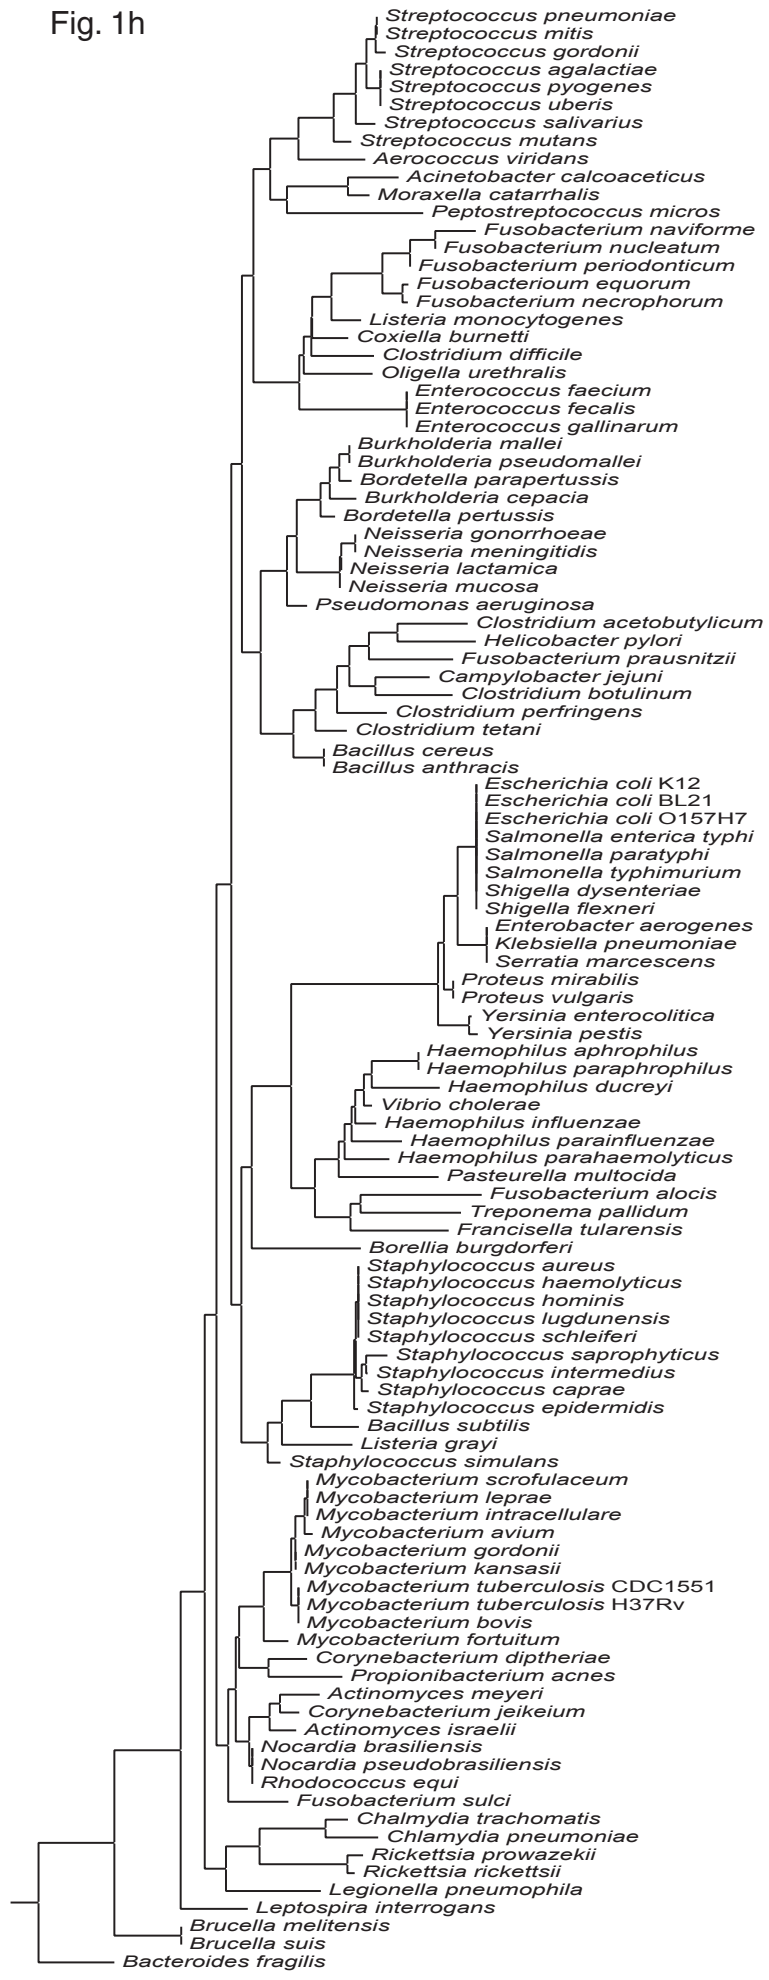

10

Supplement: NIHMS22082-supplement-06.pdf [file NIHMS22082-supplement-06.pdf]
